# Supplementary material
Source: PubMed Central journal article supplement (PMC6645876)
Supplement: ao8b00092_si_001.pdf [file ao8b00092_si_001.pdf]

## Supporting Information

# Highly Pure Silica Nanoparticles with High Adsorption Capacity obtained from Sugarcane Waste Ash

Suzimara Rovani,<sup>†</sup> Jonnatan J. Santos,<sup>\*,‡</sup> Paola Corio<sup>‡</sup> and Denise A. Fungaro<sup>†</sup>

<sup>†</sup>Instituto de Pesquisas Energéticas e Nucleares (IPEN-CNEN/SP) - Av. Prof. Lineu Prestes, 2242, Cidade Universitária, 05508-000 São Paulo, SP, Brazil.

<sup>‡</sup>Instituto de Química, Universidade de São Paulo - Av. Prof. Lineu Prestes, 748, Cidade Universitária, P.O. Box 26077, 05508-000, São Paulo, SP, Brazil.

E-mail: jonnatan@iq.usp.br

## Summary of Content

16 pages

5 equations: S1, S2, S3, S4, S5

7 tables: S1, S2, S3, S4, S5, S6, S7

11 figures: S1 (A) & (B) & (C) & (D), S2 (A) & (B) & (C), S3, S4, S5 (A) & (B) & (C), S6, S7 (A) & (B), S8, S9, S10 (insert in Fig. S10), S11

2 Schemes: Scheme S1, S2

## Supplement: EDS and TEM of sugarcane waste ash and SiO<sub>2</sub>NPs

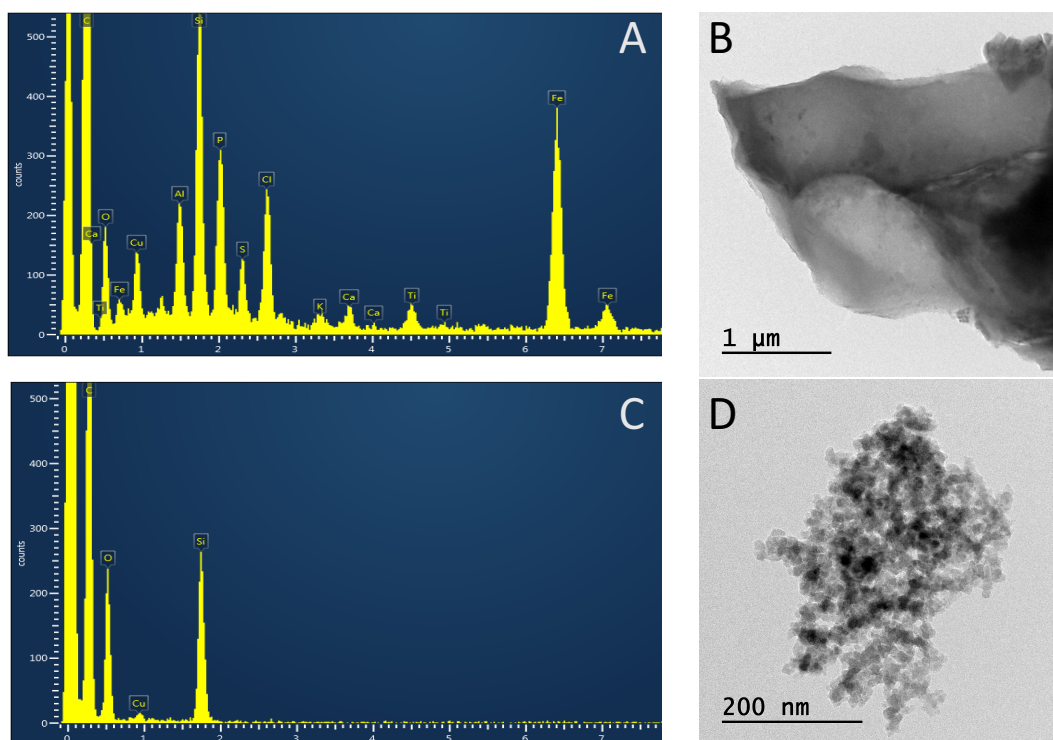

**Figure S1.** Sugarcane waste ash EDS (A) and TEM image (B) and silica nanoparticles EDS (C) and TEM image (D).

EDS of sugarcane waste ash shows the presence of several different elements (being Si, Fe, Al, P, Cl and S more abundant) and only Si and O were observed after silica nanoparticles synthesis procedure (Cu signal comes from TEM grid).

## Supplement: Assignments of the IR vibrations

**Table S1.** Assignments of the IR vibrations of AO8 dye adsorption in the SiO<sub>2</sub>NPs adsorbent.

| Frequency (cm <sup>-1</sup> ) | Assignment                                 | References                                                                        |
|-------------------------------|--------------------------------------------|-----------------------------------------------------------------------------------|
| 2922                          | v <sub>as</sub> (CH <sub>2</sub> ) of CTAB | Zhang <i>et al.</i> <sup>1</sup>                                                  |
| 2850                          | v <sub>s</sub> (CH <sub>2</sub> ) of CTAB  | Zhang <i>et al.</i> <sup>1</sup>                                                  |
| 1621                          | v(-C=C-)                                   | Ciric-Marjanovic <i>et al.</i> <sup>2</sup>                                       |
| 1554                          | v <sub>as</sub> (-COOH)                    | Konicki <i>et al.</i> <sup>3</sup>                                                |
| 1509                          | v(CC) <sub>ar</sub>                        | Kowczyk-Sadowy <i>et al.</i> <sup>4</sup>                                         |
| 1490                          | v(CC) <sub>ar</sub>                        | Kowczyk-Sadowy <i>et al.</i> <sup>4</sup>                                         |
| 1480                          | v(CC) <sub>ar</sub>                        | Kowczyk-Sadowy <i>et al.</i> <sup>4</sup>                                         |
| 1468                          | v(CC) <sub>ar</sub>                        | Kowczyk-Sadowy <i>et al.</i> <sup>4</sup>                                         |
| 1450                          | azo group (-N=N-)                          | Dent <sup>5</sup>                                                                 |
| 1199                          | phenolic -OH group<br>δ(C-H) and δ(C-N)    | Konicki <i>et al.</i> <sup>6</sup><br>Ciric-Marjanovic <i>et al.</i> <sup>2</sup> |
| 1058                          | v <sub>as</sub> (Si-O-Si)                  | Boza <i>et al.</i> , <sup>7</sup> Hu and Hsieh <sup>8</sup>                       |
| 1031                          | v(O=S=O)                                   | Dent <sup>5</sup> and Konicki <i>et al.</i> <sup>6</sup>                          |
| 965                           | δ(OH) of silanol groups                    | Boza <i>et al.</i> , <sup>7</sup> Hu and Hsieh <sup>8</sup>                       |
| 827                           | δ(C-H) of aromatic ring                    | Ciric-Marjanovic <i>et al.</i> <sup>2</sup>                                       |
| 799                           | v <sub>s</sub> (Si-O-Si)                   | Boza <i>et al.</i> , <sup>7</sup> Hu and Hsieh <sup>8</sup>                       |
| 751                           | Out of plane deformation of ring           | Kowczyk-Sadowy <i>et al.</i> <sup>4</sup>                                         |
| 722                           | δ(=C-H) of aromatic ring                   | Santos <i>et al.</i> <sup>9</sup>                                                 |
| 689                           | Out of plane deformation of ring           | Ciric-Marjanovic <i>et al.</i> <sup>2</sup>                                       |
| 641                           | In plane deformation of ring               | Kowczyk-Sadowy <i>et al.</i> <sup>4</sup>                                         |
| 610                           | In plane deformation of ring               | Kowczyk-Sadowy <i>et al.</i> <sup>4</sup>                                         |
| 603                           | In plane deformation of ring               | Kowczyk-Sadowy <i>et al.</i> <sup>4</sup>                                         |
| 446                           | v <sub>s</sub> (Si-O-Si)                   | Boza <i>et al.</i> , <sup>7</sup> Hu and Hsieh <sup>8</sup>                       |

\*Symbols denotation: “v” stretching; “δ” bending.

## Supplement: TG analyses

The TG analyses were performed under oxygen atmosphere.

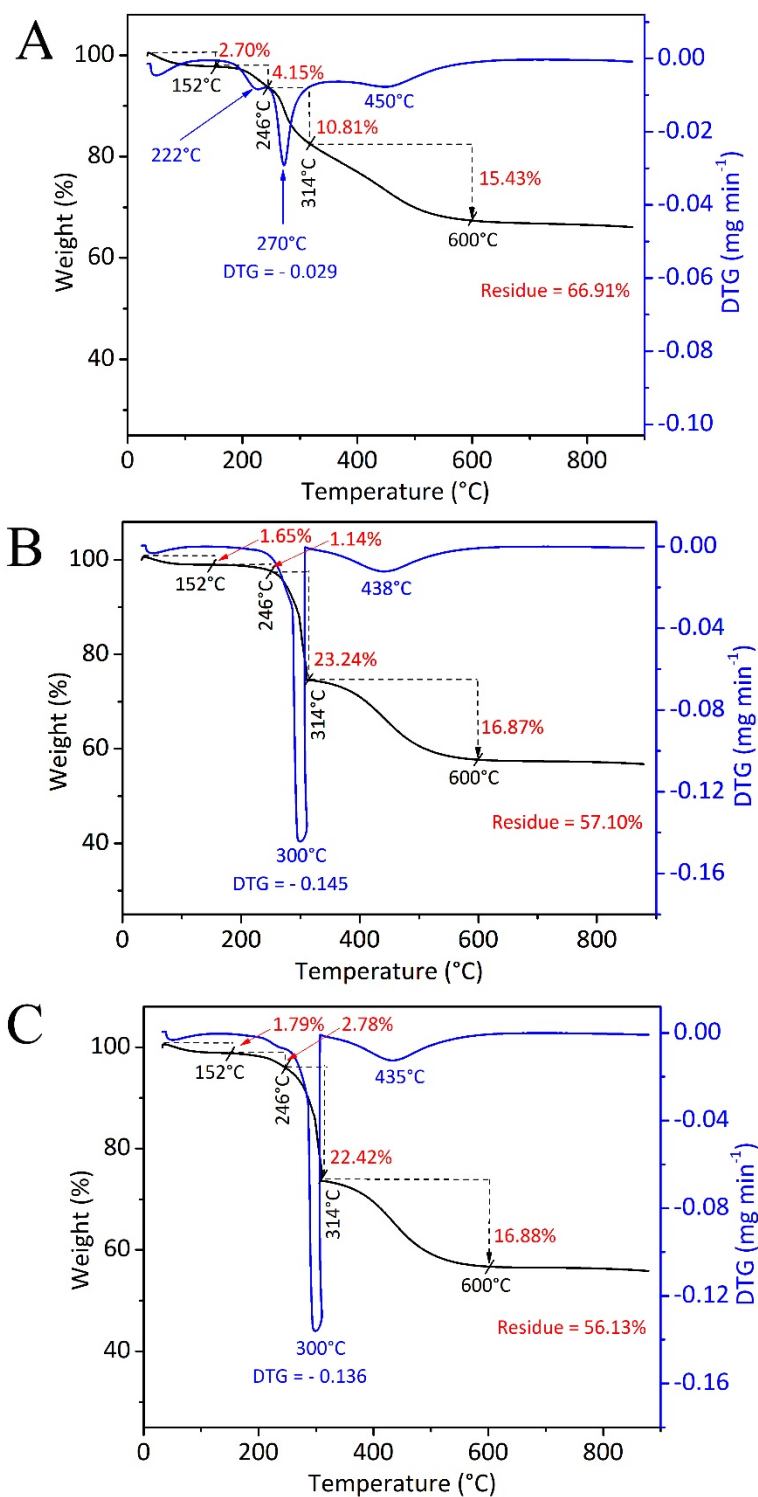

**Figure S2.** TG and DTG curves of (A) SiO<sub>2</sub>NPs + AO8 ( $C_i = 75 \text{ mg L}^{-1}$ ), (B) SiO<sub>2</sub>NPs + AO8 ( $C_i = 600 \text{ mg L}^{-1}$ ), and (C) SiO<sub>2</sub>NPs + AO8 ( $C_i = 1000 \text{ mg L}^{-1}$ ).



**Table S2.** Thermogravimetric analyses of SiO<sub>2</sub>NPs and SiO<sub>2</sub>NPs after AO8 adsorption.

| Samples                                                              | 1 <sup>a</sup> wt. loss (%) | 2 <sup>a</sup> wt. loss (%) | 3 <sup>a</sup> wt. loss (%) | 4 <sup>a</sup> wt. loss (%) | Residue (%) |
|----------------------------------------------------------------------|-----------------------------|-----------------------------|-----------------------------|-----------------------------|-------------|
|                                                                      | 25-152°C                    | 152-238°C                   | 238-268°C                   | 268-600°C                   | ↑ 600°C     |
| SiO <sub>2</sub> NPs                                                 | 3.08                        | 6.55                        | 14.82                       | 10.81                       | 64.74       |
|                                                                      | 25-152°C                    | 152-246°C                   | 246-314°C                   | 314-600°C                   | ↑ 600°C     |
| SiO <sub>2</sub> NPs + dye (C <sub>i</sub> 50 mg L <sup>-1</sup> )   | 3.85                        | 4.19                        | 9.63                        | 12.38                       | 69.95       |
| SiO <sub>2</sub> NPs + dye (C <sub>i</sub> 75 mg L <sup>-1</sup> )   | 2.70                        | 4.15                        | 10.81                       | 15.43                       | 66.91       |
| SiO <sub>2</sub> NPs + dye (C <sub>i</sub> 100 mg L <sup>-1</sup> )  | 2.28                        | 3.83                        | 11.70                       | 18.22                       | 63.97       |
| SiO <sub>2</sub> NPs + dye (C <sub>i</sub> 150 mg L <sup>-1</sup> )  | 2.16                        | 3.68                        | 12.00                       | 19.73                       | 62.43       |
| SiO <sub>2</sub> NPs + dye (C <sub>i</sub> 200 mg L <sup>-1</sup> )  | 1.99                        | 2.70                        | 17.63                       | 16.13                       | 61.55       |
| SiO <sub>2</sub> NPs + dye (C <sub>i</sub> 400 mg L <sup>-1</sup> )  | 1.97                        | 1.36                        | 24.97                       | 14.31                       | 57.39       |
| SiO <sub>2</sub> NPs + dye (C <sub>i</sub> 600 mg L <sup>-1</sup> )  | 1.65                        | 1.14                        | 23.24                       | 16.87                       | 57.10       |
| SiO <sub>2</sub> NPs + dye (C <sub>i</sub> 1000 mg L <sup>-1</sup> ) | 1.79                        | 2.78                        | 22.42                       | 16.88                       | 56.13       |

**Table S3.** Thermogravimetric analyses of CTAB.

| Sample | 1 <sup>a</sup> wt. loss (%) | 2 <sup>a</sup> wt. loss (%) | 3 <sup>a</sup> wt. loss (%) | Residue (%) |
|--------|-----------------------------|-----------------------------|-----------------------------|-------------|
|        | 25-180°C                    | 180-300°C                   | 300-490°C                   | ↑ 490°C     |
| CTAB   | 0.00                        | 86.55                       | 12.41                       | 1.04        |

**Table S4.** Thermogravimetric analyses of AO8 dye.

| Sample | 1 <sup>a</sup> wt. loss (%) | 2 <sup>a</sup> wt. loss (%) | 3 <sup>a</sup> wt. loss (%) | 4 <sup>a</sup> wt. loss (%) | 5 <sup>a</sup> wt. loss (%) | Residue (%) |
|--------|-----------------------------|-----------------------------|-----------------------------|-----------------------------|-----------------------------|-------------|
|        | 25-137°C                    | 137-305°C                   | 305-344°C                   | 344-468°C                   | 468-600°C                   | ↑ 600°C     |
| AO8    | 4.52                        | 2.47                        | 12.39                       | 12.93                       | 38.62                       | 29.07       |

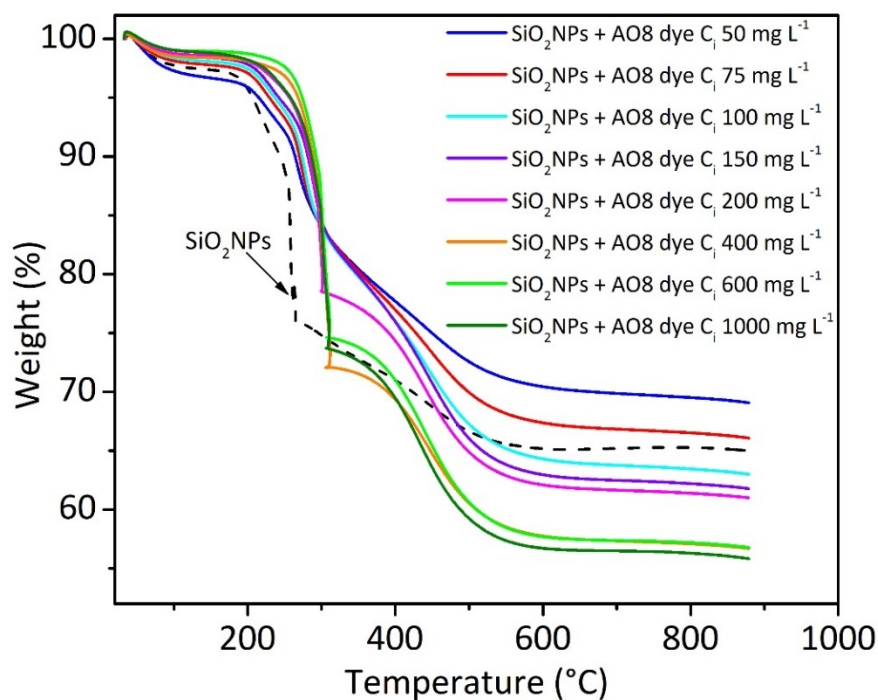

**Figure S3.** TG and DTG curves of SiO<sub>2</sub>NPs, and SiO<sub>2</sub>NPs + AO8 dye in different initial concentrations.

Supplement: FTIR analysis after TG analysis

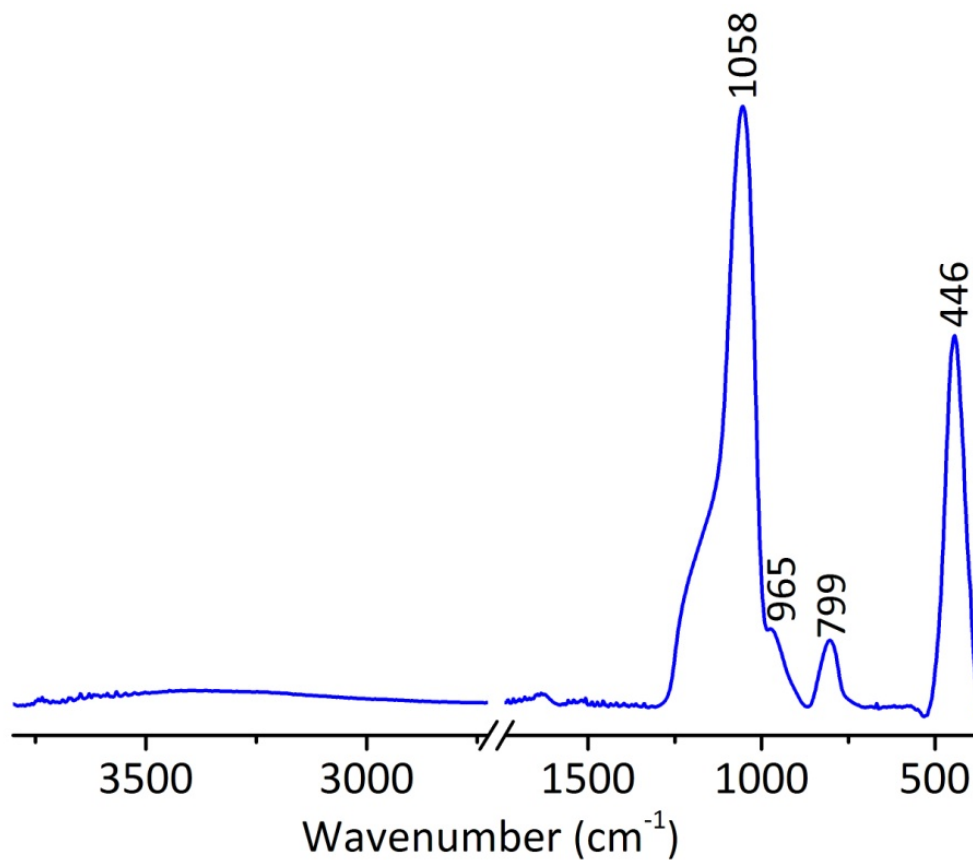

**Figure S4.** FTIR-ATR spectrum of the silica nanoparticles + AO8 dye ( $C_i = 200 \text{ mg L}^{-1}$ ) after TG analysis.

The residue of the sample ( $\text{SiO}_2\text{NPs}$  after AO8 adsorption) after TG analysis has only  $\text{SiO}_2\text{NPs}$  according to IR spectra Fig. S4.

Supplement: Kinetic AO8 adsorption for initial concentration  $200 \text{ mg L}^{-1}$

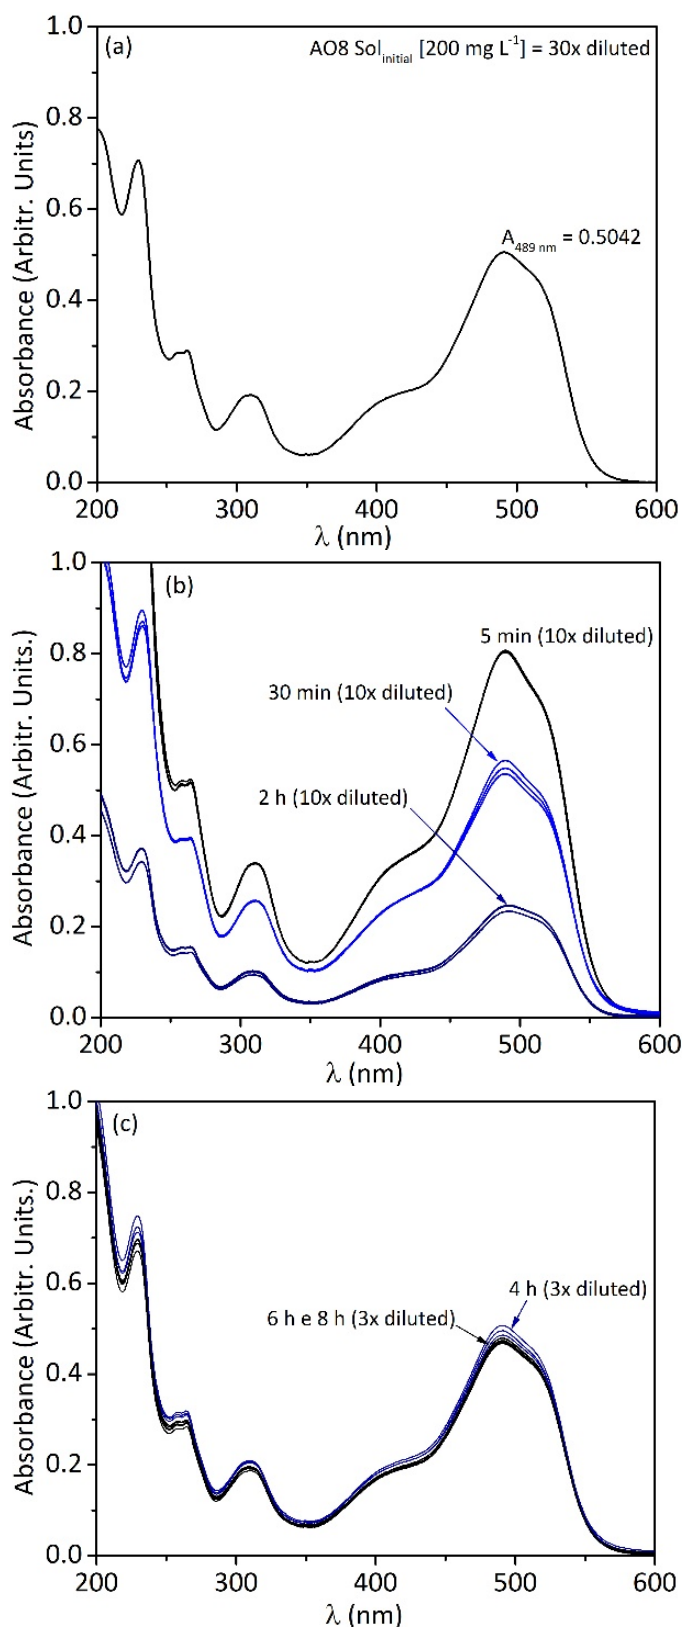

**Figure S5.** UV-Visible spectra before AO8 dye adsorption (a) initial solution  $200 \text{ mg L}^{-1}$ , after AO8 adsorption at  $25^\circ \text{C}$  (b) 5-30 min and 2 h and (c) 4, 6 and 8 h. Samples in triplicate.

Supplement: Kinetic adsorption

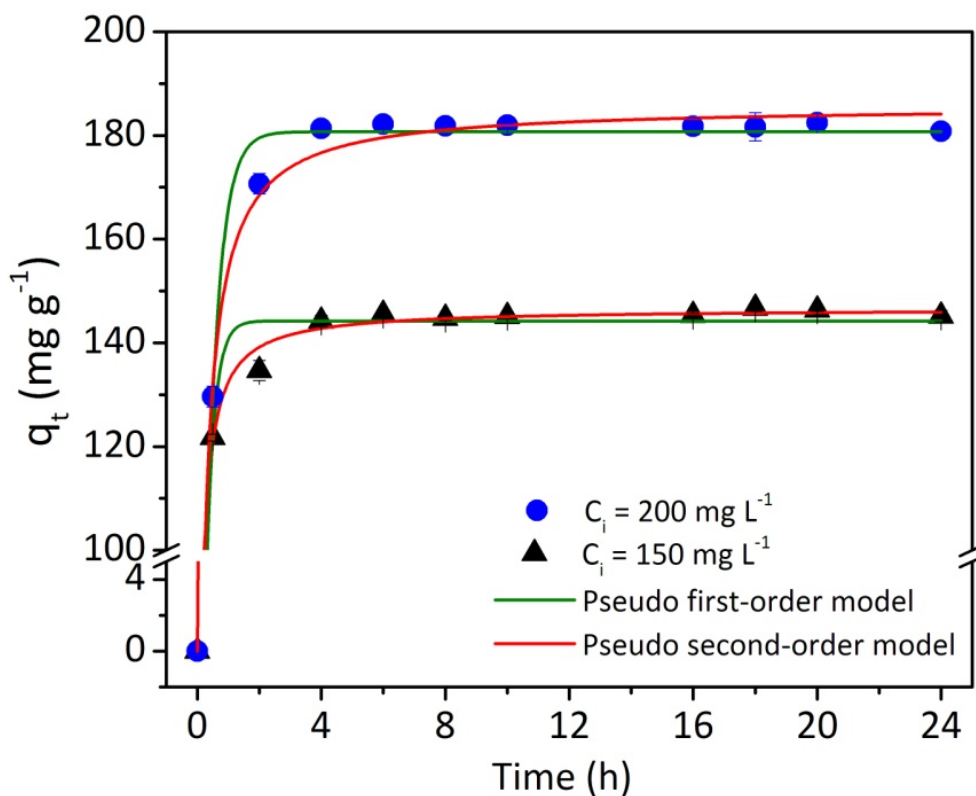

**Figure S6.** Pseudo first and pseudo second order model kinetics plot for the removal of AO8 by silica nanoparticles adsorbent. Conditions: 25°C,  $C_i = 150$  and  $200 \text{ mg L}^{-1}$ , adsorbent mass  $1.0 \text{ g L}^{-1}$ .

**Table S5.** Kinetic parameters for the removal of AO8 by silica nanoparticles adsorbent.

| Kinetic Parameters                              | $C_i = 150 \text{ mg L}^{-1}$ | $C_i = 200 \text{ mg L}^{-1}$ |
|-------------------------------------------------|-------------------------------|-------------------------------|
| <b>Pseudo first-order</b>                       |                               |                               |
| $k_1 \text{ (h}^{-1}\text{)}$                   | 3.70                          | 2.49                          |
| $q_e \text{ (mg g}^{-1}\text{)}$                | 144                           | 180                           |
| $R_{\text{adj}}^2$                              | 0.993                         | 0.996                         |
| <b>Pseudo second-order</b>                      |                               |                               |
| $k_2 \text{ (g mg}^{-1} \text{ h}^{-1}\text{)}$ | 0.063                         | 0.026                         |
| $q_e \text{ (mg g}^{-1}\text{)}$                | 146                           | 185                           |
| $R_{\text{adj}}^2$                              | 0.998                         | 0.997                         |
| <b>Experimental Parameter</b>                   |                               |                               |
| $q_e \text{ exp. (mg g}^{-1}\text{)}$           | 145                           | 182                           |

## Supplement: Equilibrium adsorption

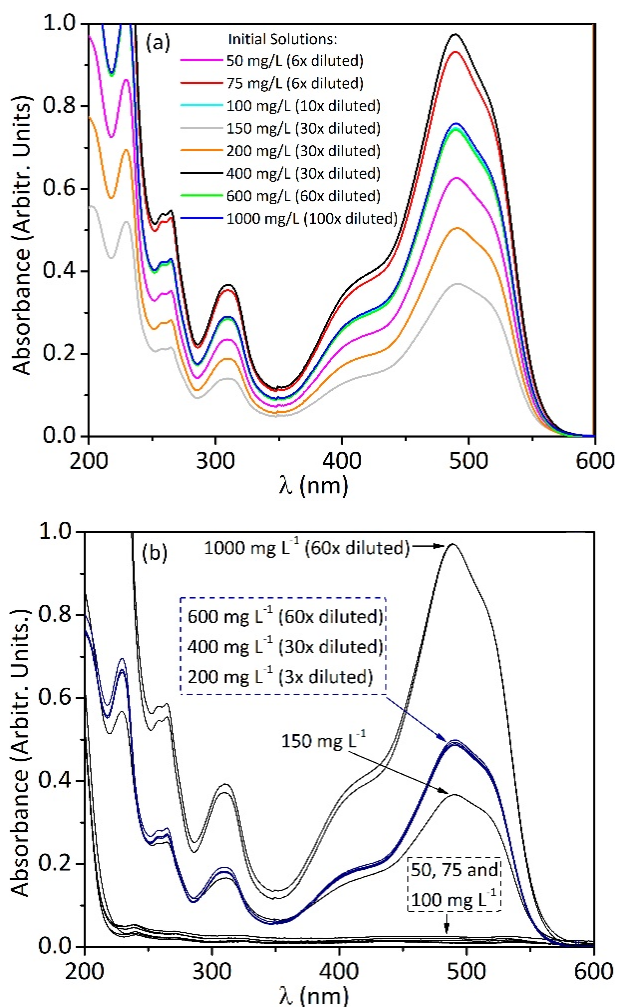

**Figure S7.** UV-Visible spectra before AO8 dye adsorption (a) initial solutions at concentrations from 50 to 1000  $\text{mg L}^{-1}$ , after AO8 adsorption at equilibrium time 4 h (b) 25°C isotherm. Samples in triplicate.

**Table S6.** Equilibrium parameters for the removal of AO8 by silica nanoparticles adsorbent.

| Equilibrium Parameters                                   | 25°C  | 35°C  | 45°C  |
|----------------------------------------------------------|-------|-------|-------|
| <b>Langmuir</b>                                          |       |       |       |
| $Q_{\text{max}}$ ( $\text{mg g}^{-1}$ )                  | 187   | -     | -     |
| $K_L$ ( $\text{L mg}^{-1}$ )                             | 5.79  | -     | -     |
| $R_{\text{adj}}^2$                                       | 0.889 | -     | -     |
| <b>Freundlich</b>                                        |       |       |       |
| $K_F$ ( $\text{mg g}^{-1} (\text{mg L}^{-1})^{-1/n_F}$ ) | 109   | -     | -     |
| $n_F$                                                    | 9.25  | -     | -     |
| $R_{\text{adj}}^2$                                       | 0.952 | -     | -     |
| <b>Liu</b>                                               |       |       |       |
| $Q_{\text{max}}$ ( $\text{mg g}^{-1}$ )                  | 230   | 228   | 233   |
| $K_g$ ( $\text{L mg}^{-1}$ )                             | 1.19  | 1.29  | 0.893 |
| $n_L$                                                    | 0.346 | 0.381 | 0.378 |
| $R_{\text{adj}}^2$                                       | 0.991 | 0.978 | 0.979 |

Supplement: AO8 adsorption time for initial concentration  $20 \text{ mg L}^{-1}$

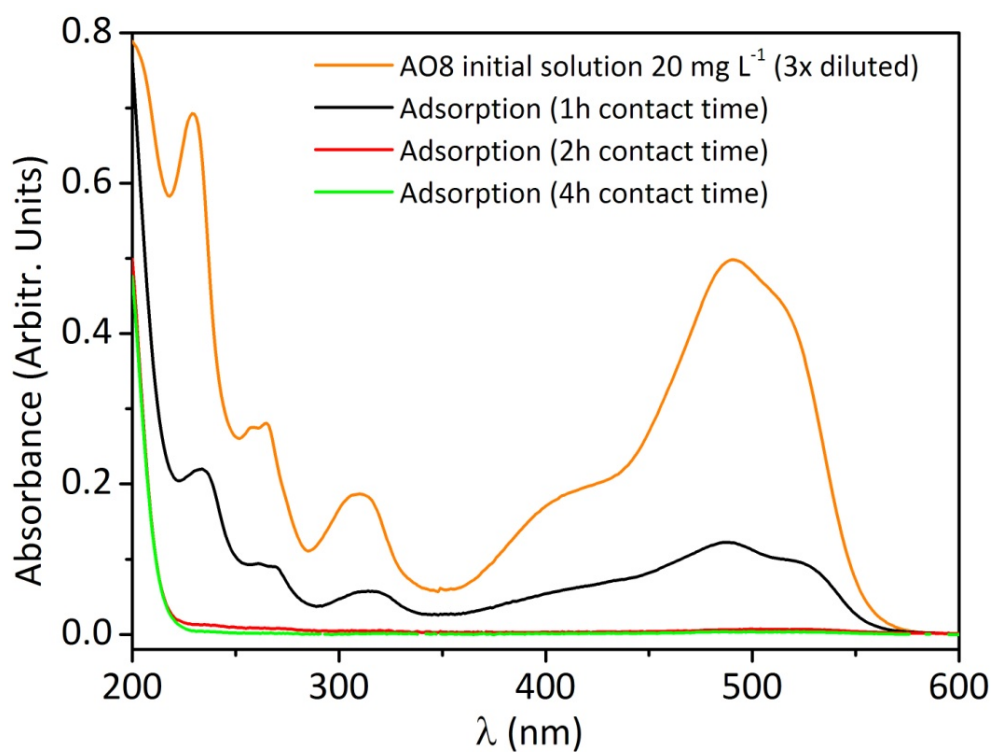

**Figure S8.** UV-Visible spectra before AO8 dye adsorption (orange line) initial solution  $20 \text{ mg L}^{-1}$  and after AO8 adsorption at  $25^\circ\text{C}$  (black line) 1 h contact time; (red line) 2h contact time; and (green line) 4h contact time.

For low concentrations of AO8 dye a shorter contact time (2 h) between adsorbate-adsorbent is sufficient to adsorb all dye.

Supplement: SiO<sub>2</sub>NPs reuse cycles

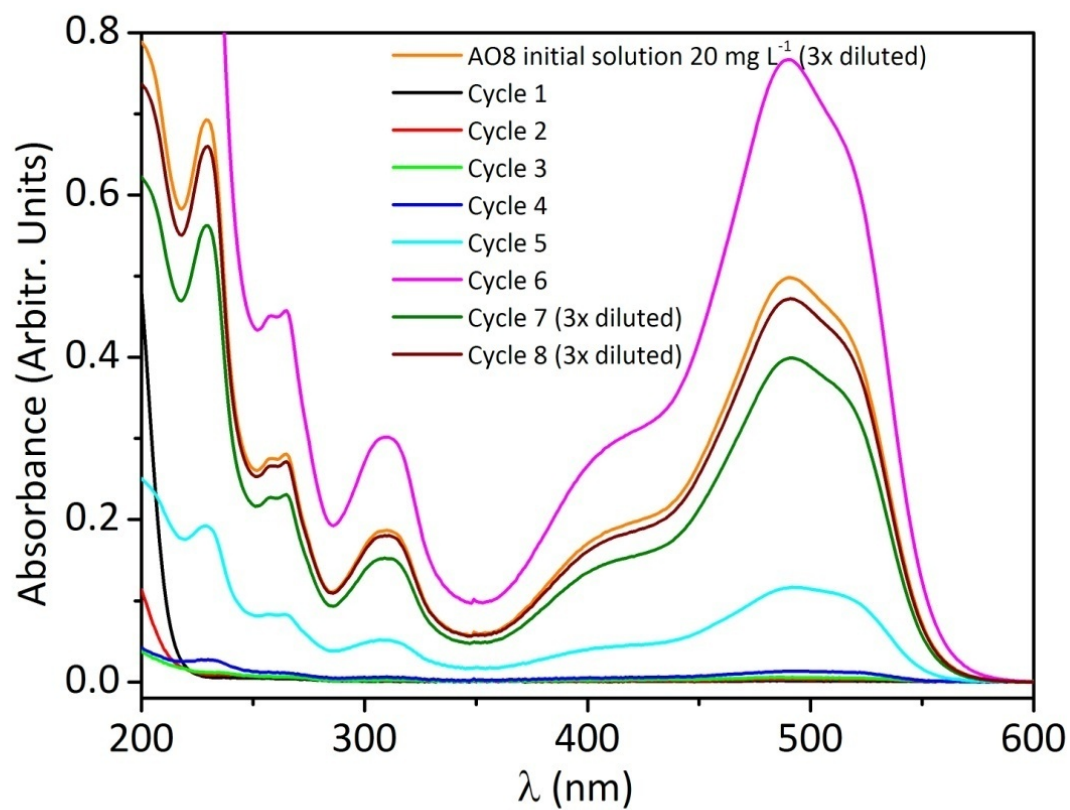

**Figure S9.** UV-Visible spectra before AO8 dye adsorption (orange line) initial solutions 20 mg L<sup>-1</sup>, and reuse cycles of SiO<sub>2</sub>NPs after AO8 adsorption,  $C_i = 20 \text{ mg}\cdot\text{L}^{-1}$  at 25°C for 2h, adsorbent mass 1.0 g L<sup>-1</sup>.

Supplement: Analytical curve

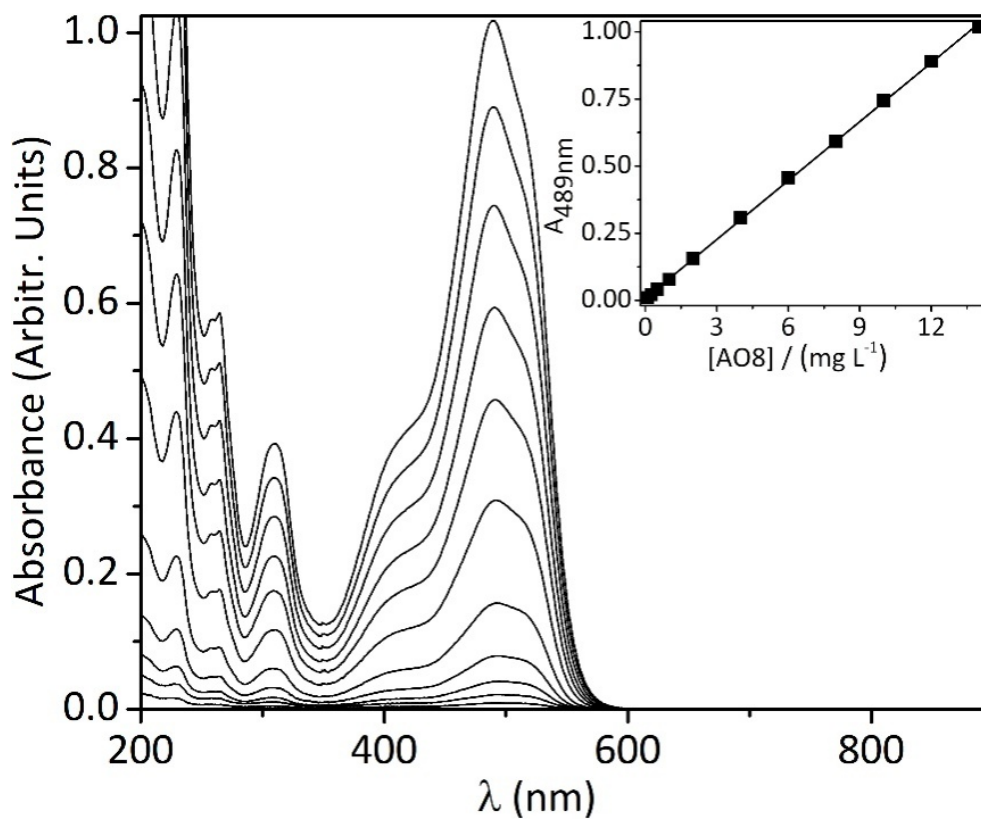

**Figure S10.** UV-Visible spectra of solution containing AO8 dye at concentrations from 0.10 to 14.00 mg L<sup>-1</sup>. Insert: analytical curve of AO8 dye.

The equation of the analytical curve (insert in Fig. S10) was  $A = 0.00732 + 0.07315 \cdot [\text{AO8}]$  (mg L<sup>-1</sup>), and the value of the coefficient of determination adjusted ( $R^2_{\text{adj}}$ ) was 0.99963.



## Supplement: Physical and chemical properties of Acid Orange 8

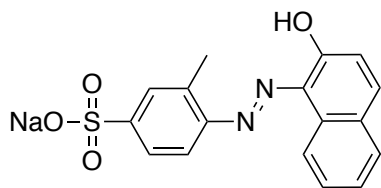

**Figure S11.** Chemical structure of Acid Orange 8.

**Table S7.** Physical and chemical properties of Acid Orange 8.

| Physico-Chemical Properties |                                                                   |
|-----------------------------|-------------------------------------------------------------------|
| Chemical formula            | C <sub>17</sub> H <sub>13</sub> N <sub>2</sub> NaO <sub>4</sub> S |
| Molecular weight            | 364.35 g mol <sup>-1</sup>                                        |
| Structure                   | Azo                                                               |
| CAS number                  | 5850-86-2                                                         |
| Color index number          | 15575                                                             |
| Dye content                 | 65 %                                                              |
| $\lambda_{\text{max}}$ (nm) | 490 nm                                                            |

## Supplement: Kinetic and equilibrium adsorption models

### Kinetic adsorption

Kinetic adsorption models used in this publication were pseudo-first order (Eq. S1) and pseudo-second order (Eq. S2).

$$q_t = q_e \cdot (1 - e^{-k_1 t}) \quad (\text{Eq. S1})$$

$$q_t = \frac{k_2 \cdot q_e^2 \cdot t}{1 + k_2 \cdot q_e \cdot t} \quad (\text{Eq. S2})$$

Where in the Eq. S1,  $q_t$  is the amount of adsorbate adsorbed at time  $t$  ( $\text{mg g}^{-1}$ ),  $q_e$  is the equilibrium adsorption capacity ( $\text{mg g}^{-1}$ ),  $k_1$  is the pseudo-first-order rate constant ( $\text{h}^{-1}$ ), and  $t$  is the contact time (h). Eq. S2,  $k_2$  is the pseudo-second-order rate constant ( $\text{g mg}^{-1} \text{h}^{-1}$ ).<sup>10-13</sup>

### Equilibrium adsorption

Equilibrium adsorption models utilized were Langmuir<sup>14</sup> (Eq. S3); Freundlich<sup>15</sup> (Eq. S4) and Liu<sup>11</sup> (Eq. S5).

$$q_e = \frac{Q_{max} \cdot K_L \cdot C_e}{1 + K_L \cdot C_e} \quad (\text{Eq. S3})$$

$$q_e = K_F \cdot C_e^{\frac{1}{n_F}} \quad (\text{Eq. S4})$$

$$q_e = \frac{Q_{max} \cdot (K_g \cdot C_e)^{n_L}}{1 + (K_g \cdot C_e)^{n_L}} \quad (\text{Eq. S5})$$

Where for Eq. S3,  $q_e$  is the amount of adsorbate adsorbed at the equilibrium ( $\text{mg g}^{-1}$ ),  $C_e$  is the adsorbate concentration at the equilibrium, i.e.,  $C_e$  is the adsorbate concentration residual on solution ( $\text{mg L}^{-1}$ ),  $K_L$  is the Langmuir equilibrium constant ( $\text{L mg}^{-1}$ ), and  $Q_{max}$  is the maximum adsorption capacity of the adsorbent ( $\text{mg g}^{-1}$ ) assuming the formation of a monolayer of adsorbate over adsorbent.<sup>10</sup>

For Eq. S4,  $K_F$  is the Freundlich equilibrium constant ( $\text{mg g}^{-1}(\text{mg L}^{-1})^{-1/n_F}$ ),  $n_F$  is the Freundlich exponent (dimensionless) and  $C_e$  is the adsorbate concentration residual on solution ( $\text{mg L}^{-1}$ ).<sup>10</sup>

For Eq. S5,  $K_g$  is the Liu equilibrium constant ( $\text{L mg}^{-1}$ );  $n_L$  is dimensionless exponent of the Liu equation;  $Q_{max}$  is the maximum adsorption capacity of the adsorbent ( $\text{mg g}^{-1}$ ),  $C_e$  is the adsorbate concentration residual on solution ( $\text{mg L}^{-1}$ ) and  $n_L$  could assume any positive value. Liu model predicts that the active sites of the adsorbent cannot assume the same energy.<sup>10-11</sup>

Scheme 1. Preparation of Sodium Silicate Solution from SWA.

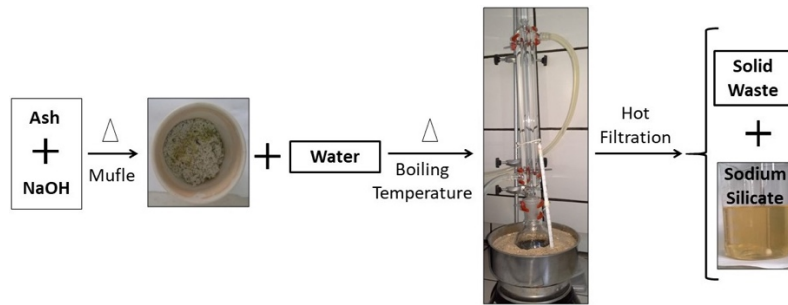

Scheme 2. Surfactant mediated synthesis of silica nanoparticles ( $\text{SiO}_2\text{NPs}$ ) from the obtained sodium silicate.

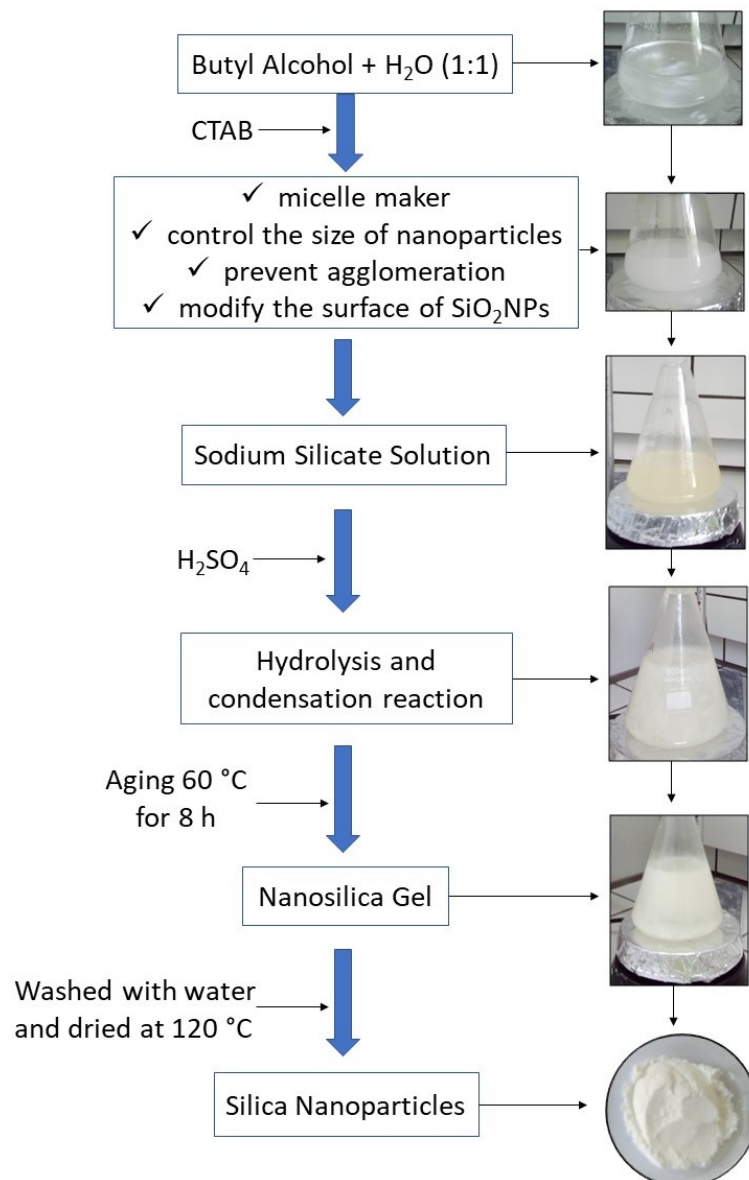

## Supplementary References

- (1) Zhang, T.; Xu, G.; Puckette, J.; Blum, F. D., Effect of Silica on the Structure of Cetyltrimethylammonium Bromide. *J. Phys. Chem. C* **2012**, *116* (21), 11626-11634.
- (2) Ćirić-Marjanović, G.; Mentus, S.; Pašti, I.; Gavrilov, N.; Krstić, J.; Travas-Sejdic, J.; Strover, L. T.; Kopecká, J.; Moravková, Z.; Trchová, M.; Stejskal, J., Synthesis, Characterization, and Electrochemistry of Nanotubular Polypyrrole and Polypyrrole-Derived Carbon Nanotubes. *J. Phys. Chem.: C* **2014**, *118* (27), 14770-14784.
- (3) Konicki, W.; Aleksandrak, M.; Moszynski, D.; Mijowska, E., Adsorption of anionic azo-dyes from aqueous solutions onto graphene oxide: Equilibrium, kinetic and thermodynamic studies. *J. Colloid Interface Sci.* **2017**, *496*, 188-200.
- (4) Kowczyk-Sadowy, M.; Świśtocka, R.; Lewandowska, H.; Piekut, J.; Lewandowski, W., Spectroscopic (FT-IR, FT-Raman, <sup>1</sup>H- and <sup>13</sup>C-NMR), Theoretical and Microbiological Study of trans o-Coumaric Acid and Alkali Metal o-Coumarates. *Molecules* **2015**, *20* (2), 3146-3169.
- (5) Dent, G., Vibrational Spectroscopy of Colors, Dyes and Pigments. In *Handbook of Vibrational Spectroscopy*, John Wiley & Sons, Ltd: 2006.
- (6) Konicki, W.; Cendrowski, K.; Chen, X.; Mijowska, E., Application of hollow mesoporous carbon nanospheres as an high effective adsorbent for the fast removal of acid dyes from aqueous solutions. *Chem. Eng. J.* **2013**, *228* (Supplement C), 824-833.
- (7) Boza, A. F.; Kupfer, V. L.; Oliveira, A. R.; Radovanovic, E.; Rinaldi, A. W.; Meneguín, J. G.; Domingues, N. L. C.; Moisés, M. P.; Favaro, S. L., Synthesis of  $\alpha$ -aminophosphonates using a mesoporous silica catalyst produced from sugarcane bagasse ash. *RSC Adv.* **2016**, *6* (29), 23981-23986.
- (8) Hu, S. X.; Hsieh, Y. L., Preparation of Activated Carbon and Silica Particles from Rice Straw. *ACS Sustain. Chem. Eng.* **2014**, *2* (4), 726-734.
- (9) Santos, R. M. M. d.; Gonçalves, R. G. L.; Constantino, V. R. L.; Santilli, C. V.; Borges, P. D.; Tronto, J.; Pinto, F. G., Adsorption of Acid Yellow 42 dye on calcined layered double hydroxide: Effect of time, concentration, pH and temperature. *Appl. Clay Sci.* **2017**, *140*, 132-139.
- (10) Lima, É. C.; Adebayo, M. A.; Machado, F. M., Kinetic and Equilibrium Models of Adsorption. In *Carbon Nanomaterials as Adsorbents for Environmental and Biological Applications*, Bergmann, C. P.; Machado, F. M., Eds. Springer International Publishing: Cham, 2015; pp 33-69.
- (11) Liu, Y.; Liu, Y.-J., Biosorption isotherms, kinetics and thermodynamics. *Sep. Purif. Technol.* **2008**, *61* (3), 229-242.
- (12) Ho, Y.-S., Review of second-order models for adsorption systems. *J. Hazard. Mater.* **2006**, *136* (3), 681-689.
- (13) Ho, Y.-S., Using of "pseudo-second-order model" in adsorption. *Environ. Sci. Pollut. Res.* **2014**, *21* (11), 7234-7235.
- (14) Langmuir, I., THE ADSORPTION OF GASES ON PLANE SURFACES OF GLASS, MICA AND PLATINUM. *J. Am. Chem. Soc.* **1918**, *40* (9), 1361-1403.
- (15) Freundlich, H. M. F., Over the Adsorption in Solution. *J. Phys. Chem.* **1906**, *57*, 385-471.
